# Supplementary material for: Chlorophyll Derivatives from Marine Cyanobacteria with Lipid-Reducing Activities
Source: PubMed Central journal article supplement (PMC6520785; doi:10.3390/md17040229), 2019-04-17
Supplement: marinedrugs-17-00229-s001.pdf [file marinedrugs-17-00229-s001.pdf]

# Supplementary Materials

## Chlorophyll derivatives from marine cyanobacteria with lipid reducing activities

Sara Freitas <sup>1,2,\*,</sup>, Natália Gonçalves Silva <sup>1,\*,</sup>, Maria Lígia Sousa <sup>1,</sup>, Tiago Ribeiro <sup>1,</sup>, Filipa Rosa <sup>1,</sup> Pedro N. Leão <sup>1,</sup> Vitor Vasconcelos <sup>1,2,</sup> Mariana Alves Reis <sup>1</sup> and Ralph Urbatzka <sup>1,2,\*</sup>

<sup>1</sup> Interdisciplinary Center of Marine and Environmental Research (CIIMAR/CIMAR), University of Porto, Terminal de Cruzeiros de Leixões, Av. General Norton de Matos s/n, 4450-208 Matosinhos, Portugal; [sfreitas@ciimar.up.pt](mailto:sfreitas@ciimar.up.pt) (S.F.), [nsilva@ciimar.up.pt](mailto:nsilva@ciimar.up.pt) (N.G.S.), [msousa@ciimar.up.pt](mailto:msousa@ciimar.up.pt) (M.L.S.), [tribeiro@ciimar.up.pt](mailto:tribeiro@ciimar.up.pt) (T.R.), [frosa@ciimar.up.pt](mailto:frosa@ciimar.up.pt) (F.R.), [pleao@ciimar.up.pt](mailto:pleao@ciimar.up.pt) (P.N.L.), [vmvascon@fc.up.pt](mailto:vmvascon@fc.up.pt) (V.V.), [mareis@ciimar.up.pt](mailto:mreis@ciimar.up.pt) (M.R.), [rurbatzka@ciimar.up.pt](mailto:rurbatzka@ciimar.up.pt) (R.U.)

<sup>2</sup> FCUP, Faculty of Science, Department of Biology, University of Porto, Rua do Campo Alegre, 4169-007, Porto, Portugal;

<sup>+</sup> Joint first authors: [sfreitas@ciimar.up.pt](mailto:sfreitas@ciimar.up.pt) (S.F.); [nsilva@ciimar.up.pt](mailto:nsilva@ciimar.up.pt) (N.G.S.);

<sup>\*</sup> Correspondence: [rurbatzka@ciimar.up.pt](mailto:rurbatzka@ciimar.up.pt); Tel.: +351 223 401 818

Received: date; Accepted: date; Published: date

## List of Contents

**Figure S1.**  $^1\text{H}$  NMR spectrum of 13<sup>2</sup>-hydroxy-pheophytin a, compound **1**, in DMSO-*d*<sub>6</sub> (400 MHz).

**Figure S2.**  $^{13}\text{C}$  NMR spectrum of 13<sup>2</sup>-hydroxy-pheophytin a, compound **1**, in DMSO-*d*<sub>6</sub> (400 MHz).

**Figure S3.** HSQC spectrum of 13<sup>2</sup>-hydroxy-pheophytin a, compound **1**, in DMSO-*d*<sub>6</sub> (400 MHz).

**Figure S4.** HMBC spectrum of 13<sup>2</sup>-hydroxy-pheophytin a, compound **1**, in DMSO-*d*<sub>6</sub> (400 MHz).

**Figure S5.**  $^1\text{H}$ - $^1\text{H}$  COSY spectrum of 13<sup>2</sup>-hydroxy-pheophytin a, compound **1**, in DMSO-*d*<sub>6</sub> (400 MHz).

**Figure S6.** Full LC-ESI-HRMS spectrum of 13<sup>2</sup>-hydroxy-pheophytin a, compound **1**, in the positive mode.

**Figure S7.** LC-ESI-HRMS/MS spectrum of 13<sup>2</sup>-hydroxy-pheophytin a, compound **1**, in the positive mode, showing the major fragments  $m/z$  869.5542 [M – OH]<sup>+</sup>,  $m/z$  609.2696 [M – phytol]<sup>+</sup>,  $m/z$  591.2602 [M – OH-phytol]<sup>+</sup>.

**Figure S8.**  $^1\text{H}$  NMR spectrum of 13<sup>2</sup>-hydroxy-pheofarnesin a, compound **2**, in CDCl<sub>3</sub> (600 MHz).

**Figure S9.**  $^{13}\text{C}$  NMR spectrum of 13<sup>2</sup>-hydroxy-pheofarnesin a, compound **2**, in CDCl<sub>3</sub> (600 MHz).

**Figure S10.** HSQC spectrum of 13<sup>2</sup>-hydroxy-pheofarnesin a, compound **2**, in CDCl<sub>3</sub> (600 MHz).

**Figure S11.** HMBC spectrum of 13<sup>2</sup>-hydroxy-pheofarnesin a, compound **2**, in CDCl<sub>3</sub> (600 MHz).

**Figure S12.**  $^1\text{H}$ - $^1\text{H}$  COSY spectrum of 13<sup>2</sup>-hydroxy-pheofarnesin a, compound **2**, in CDCl<sub>3</sub> (600 MHz).

**Figure S13.** ROESY spectrum 13<sup>2</sup>-hydroxy-pheofarnesin a, compound **2**, in DMSO-*d*<sub>6</sub> (600 MHz).

**Figure S14.** Full LC-ESI-HRMS spectrum of 13<sup>2</sup>-hydroxy-pheofarnesin a, compound **2**, in the positive mode.

**Figure S15.** LC-ESI-HRMS chromatogram of 13<sup>2</sup>-hydroxy-pheofarnesin a, compound **2**, in the positive mode, showing major fragments  $m/z$  840.4339 [M + H + Na]<sup>+</sup>, 609.2697 [M + 2H – farnesyl]<sup>+</sup>, 591.2604 [M – OH – farnesyl]<sup>+</sup>.

**Figure S16.** 3T3-L1 organoids without differentiation induction (upper images) and after differentiation induction (lower images). Differentiated organoids were formed during 5 days in DMEM medium and then exposed for 3 days to a differentiated medium, containing 10 μg/ml of insulin, 250 nM dexamethasone and 500 μM of isobutylmethylxanthine. After this step, an exposure assay to 1 or 2 can take place. Not differentiated organoids were cultured as differentiated organoids but without the differentiation medium.

**Figure S17.** LC-ESI-HRMS/MS chromatogram comparing compound **1** in 5 different alga- plant-based materials, as well as standard compound. Samples were prepared at 0.2 mg/ml in MeOH (100%). Presence of the major fragments of **1** in all samples confirm its presence in the alga- plant-based materials (HR-ESI-MS/MS  $m/z$  869.5542 [M – OH]<sup>+</sup>,  $m/z$  609.2696 [M – phytol]<sup>+</sup>,  $m/z$  591.2602 [M – OH-phytol]<sup>+</sup>).

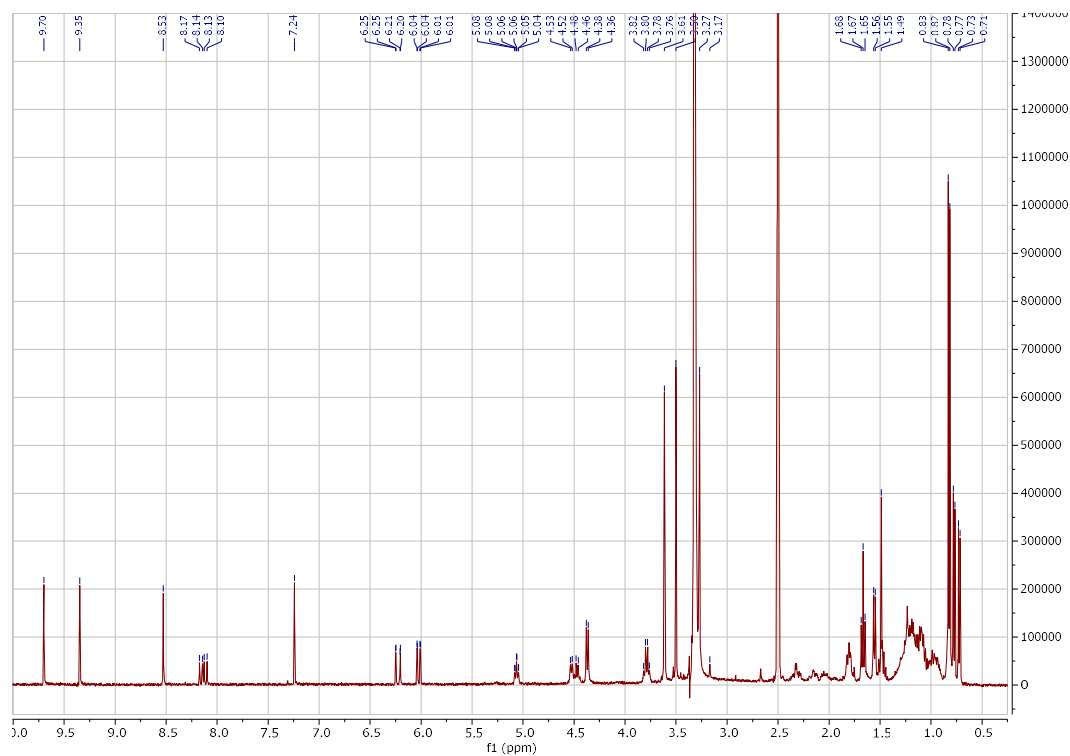

**Figure S 1** -  $^1\text{H}$  NMR spectrum of  $13^2$ -hydroxy-pheophytin a, compound **1**, in  $\text{DMSO-}d_6$  (400 MHz).

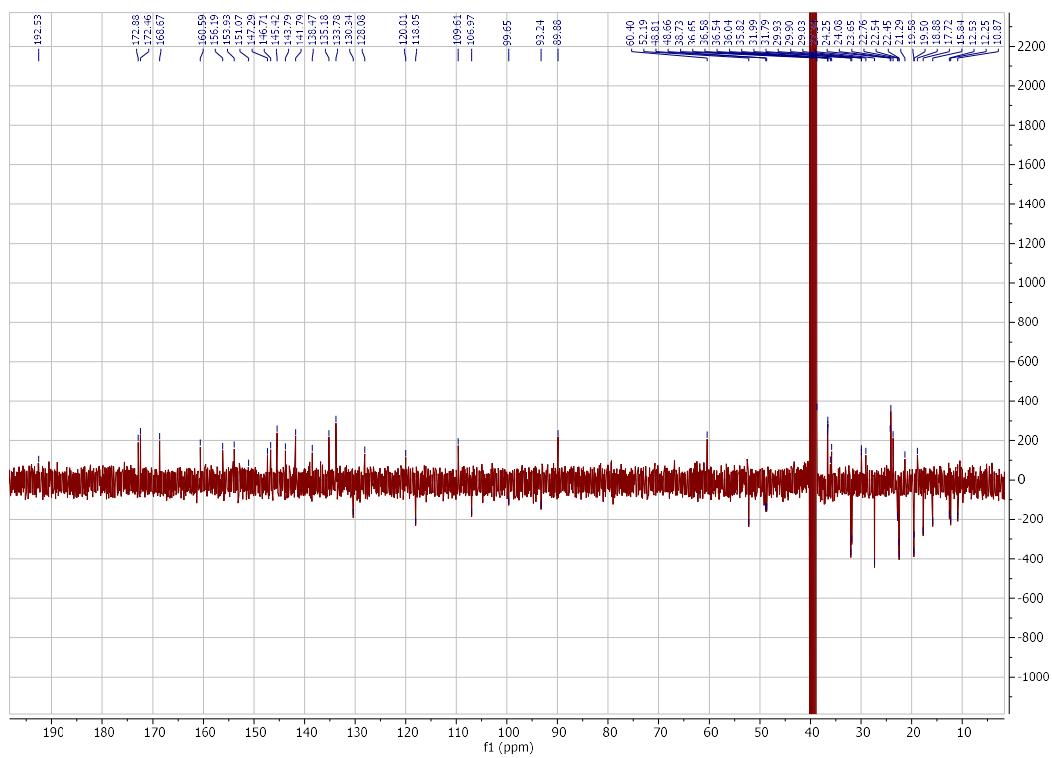

Figure S 2 -  $^{13}\text{C}$  NMR spectrum of  $^{13}\text{C}$ -hydroxy-pheophytin a, compound 1, in  $\text{DMSO-}d_6$  (400 MHz).

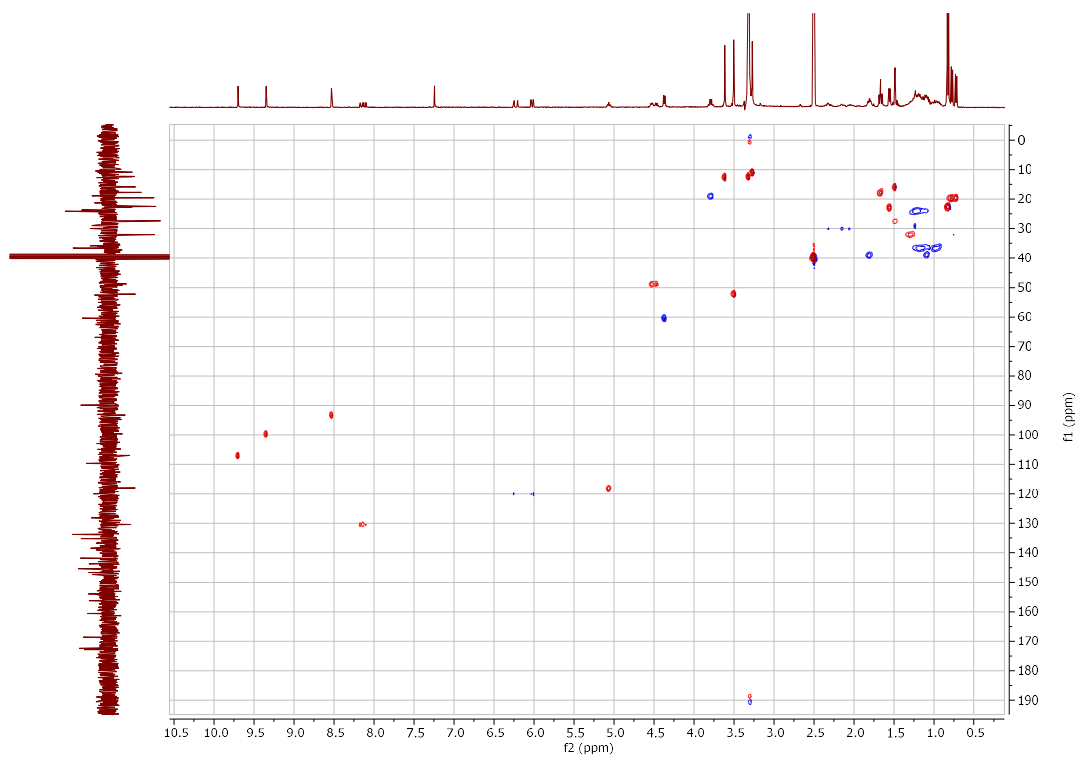

**Figure S 3** - HSQC spectrum of  $^{13}\text{C}$ -hydroxy-pheophytin a, compound **1**, in DMSO- $d_6$  (400 MHz).

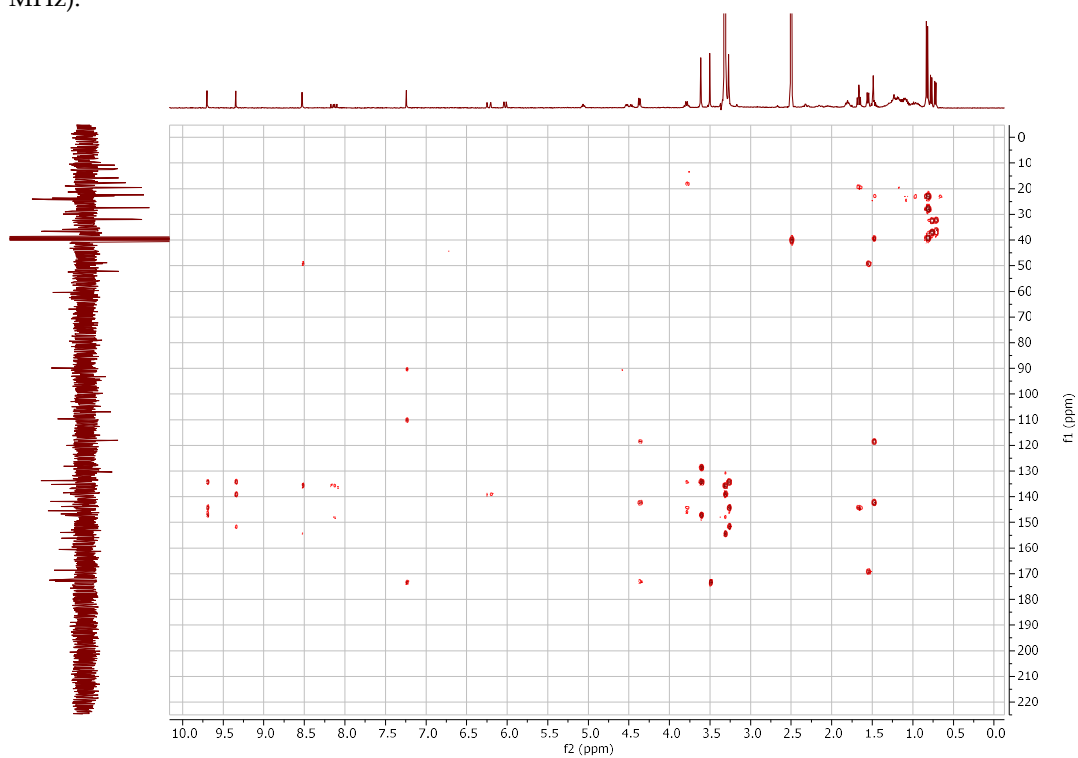

**Figure S 4** - HMBC spectrum of  $^{13}\text{C}$ -hydroxy-pheophytin a, compound **1**, in DMSO- $d_6$  (400 MHz).

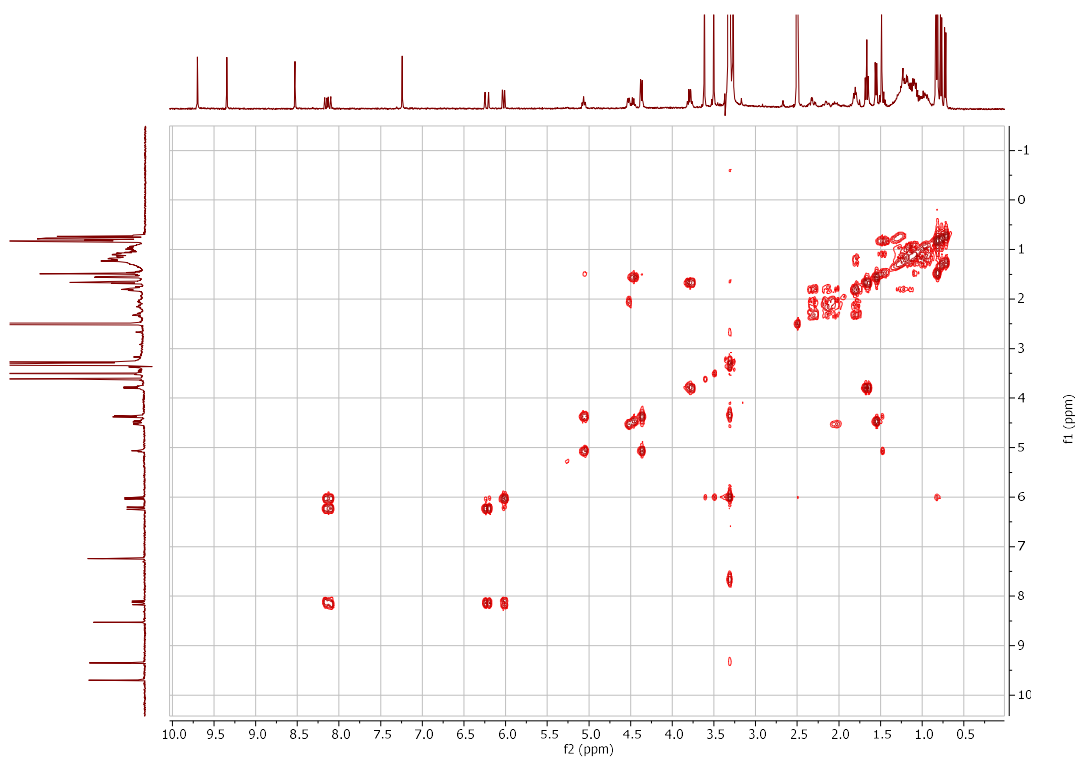

**Figure S 5** -  $^1\text{H}$ - $^1\text{H}$  COSY spectrum of  $13^2$ -hydroxy-pheophytin a, compound **1**, in  $\text{DMSO-}d_6$  (400 MHz).

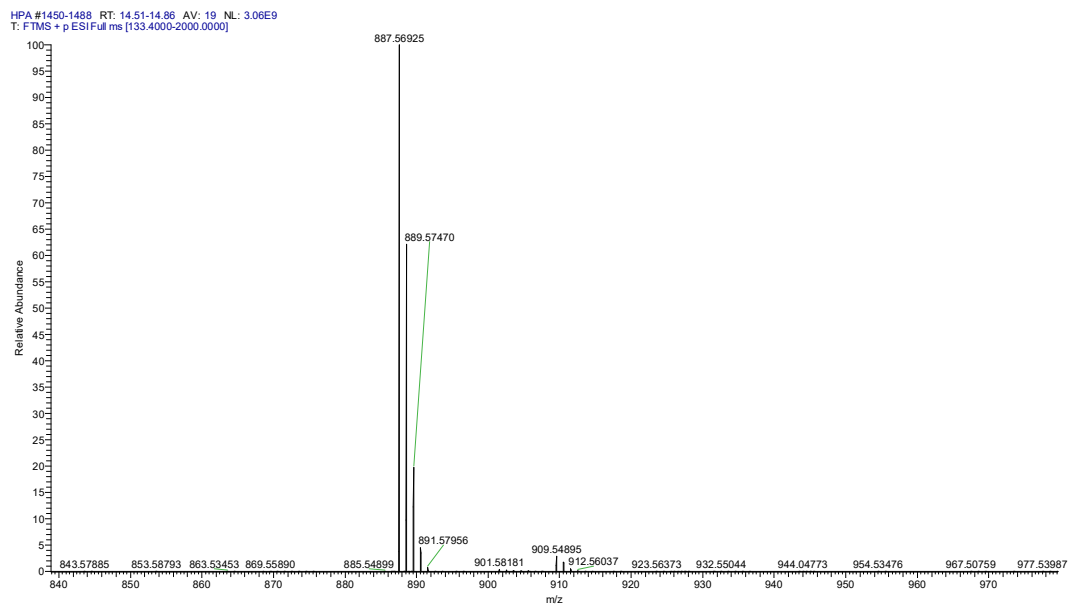

**Figure S 6** - Full LC-ESI-HRMS spectrum of  $13^2$ -hydroxy-pheophytin a, compound **1**, in the positive mode.



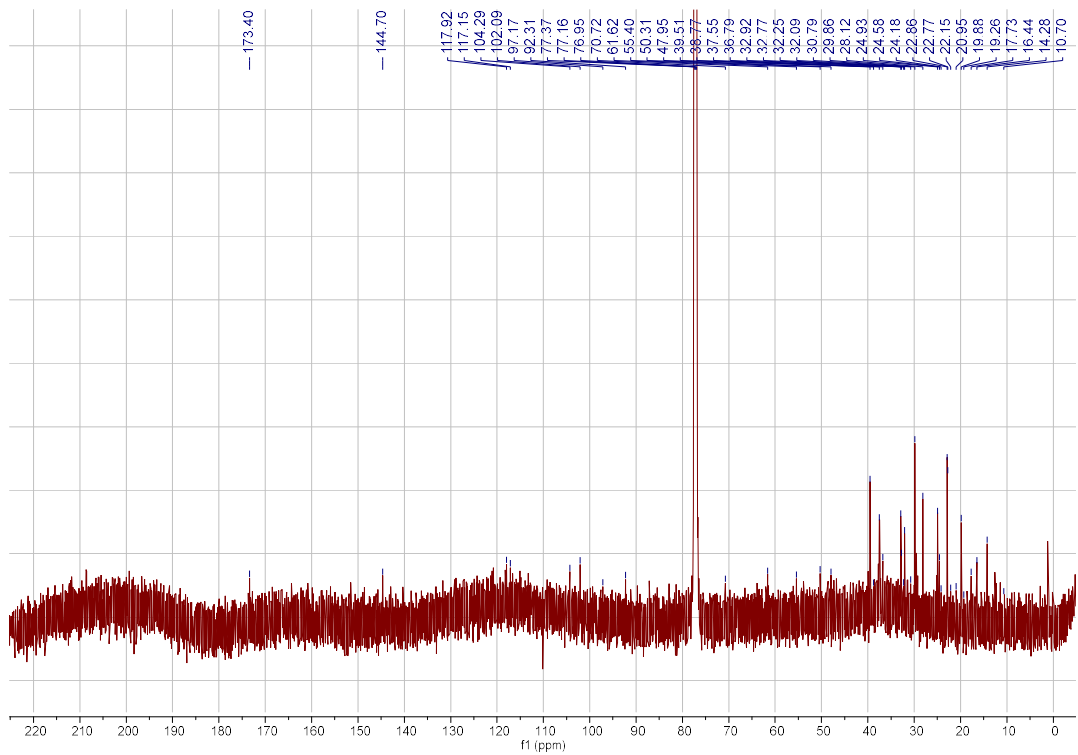

Figure S 9 -  $^{13}\text{C}$  NMR spectrum of  $^{13}\text{C}$ -hydroxy-pheofarnesin a, compound 2, in  $\text{CDCl}_3$  (600 MHz).

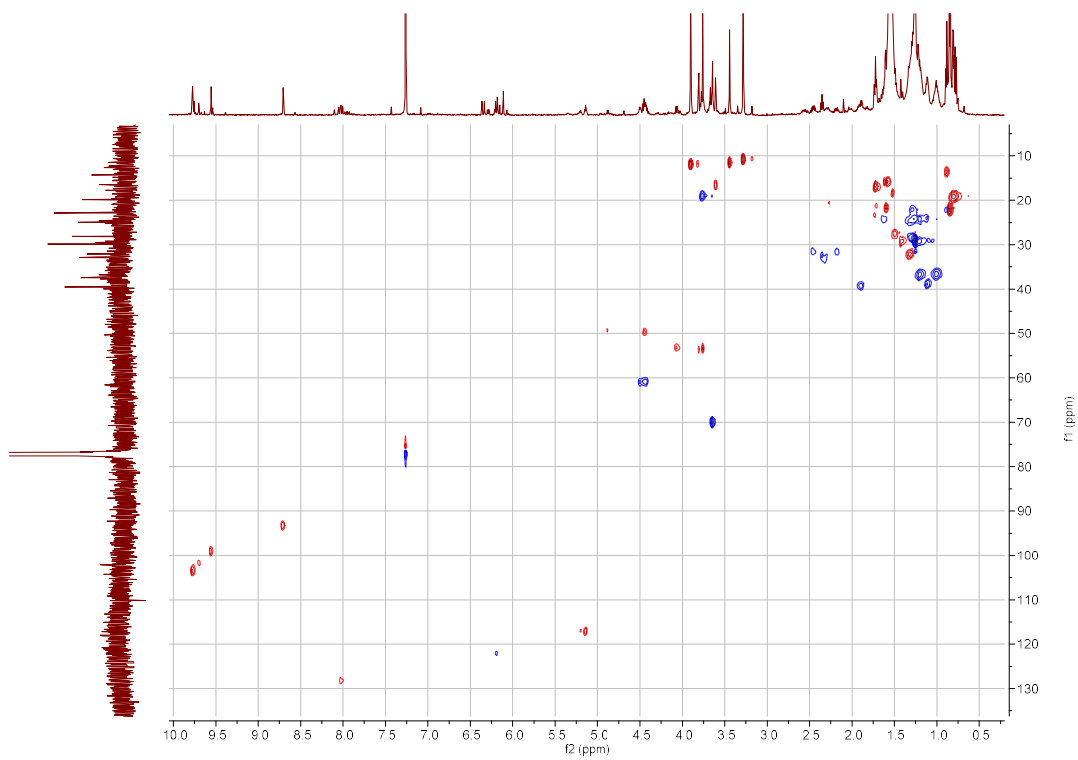

Figure S 10 - HSQC spectrum of  $^{13}\text{C}$ -hydroxy-pheofarnesin a, compound 2, in  $\text{CDCl}_3$  (600 MHz).



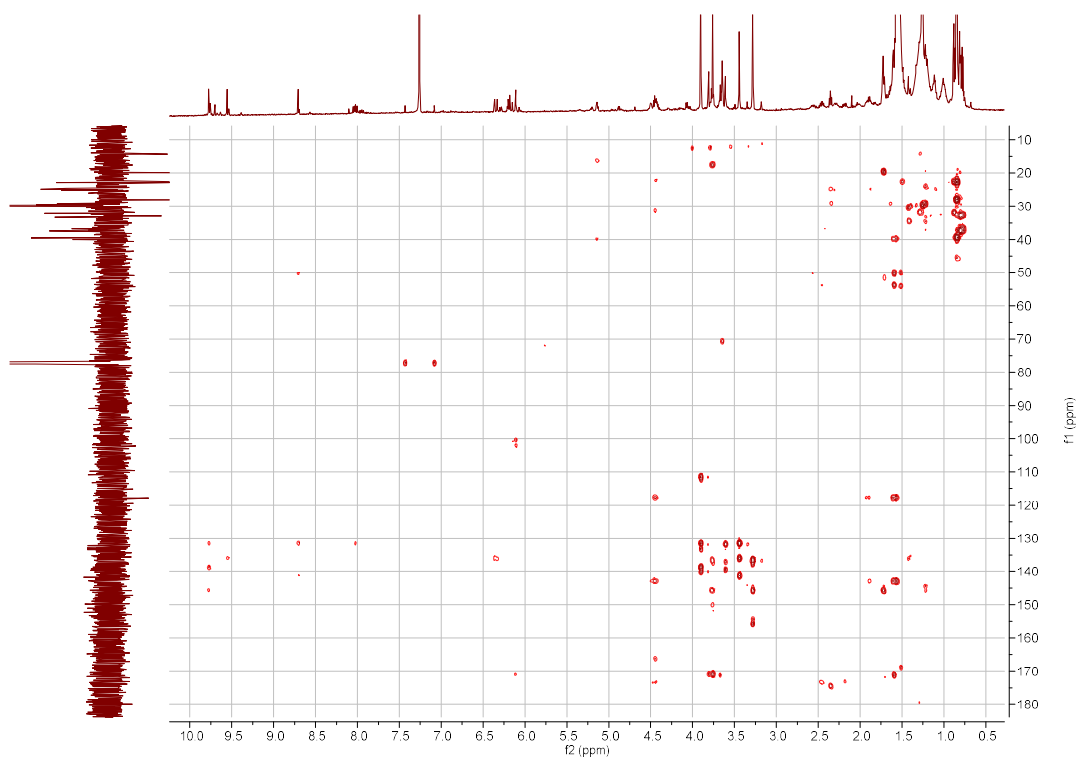

**Figure S 11** - HMBC spectrum of  $^{13}\text{C}$ -hydroxy-pheofarnesin a, compound **2**, in  $\text{CDCl}_3$  (600 MHz).

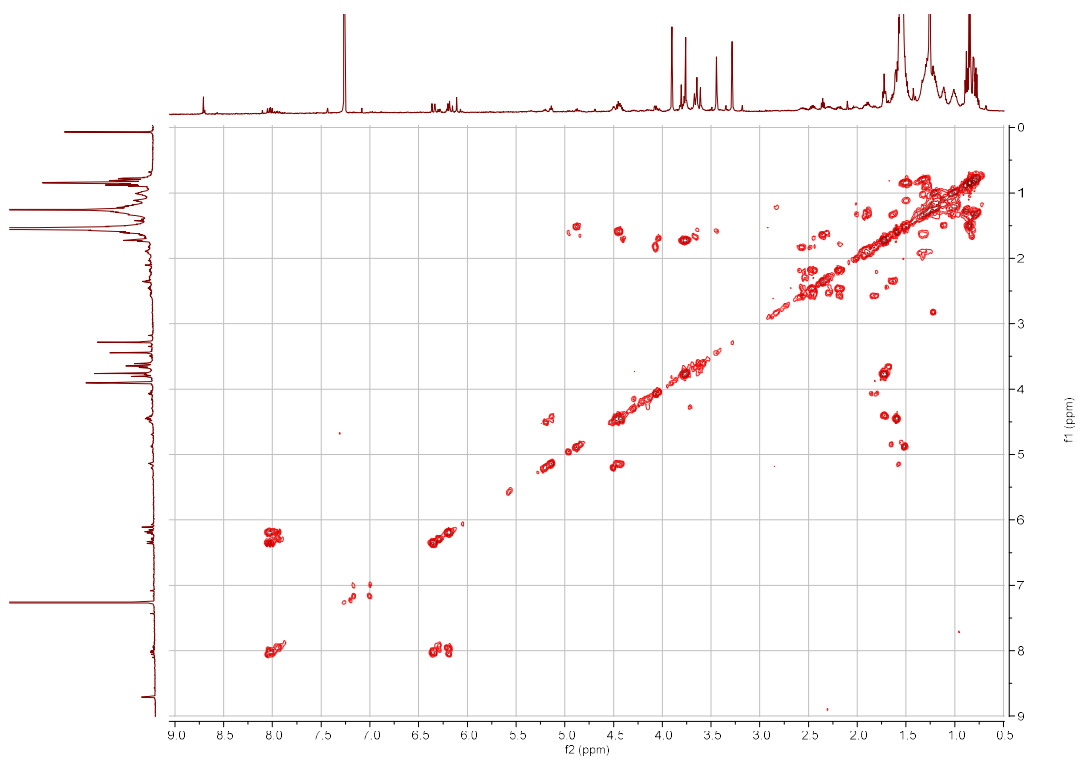

**Figure S 12** -  $^1\text{H}$ - $^1\text{H}$  COSY spectrum of  $^{13}\text{C}$ -hydroxy-pheofarnesin a, compound **2**, in  $\text{CDCl}_3$  (600 MHz).

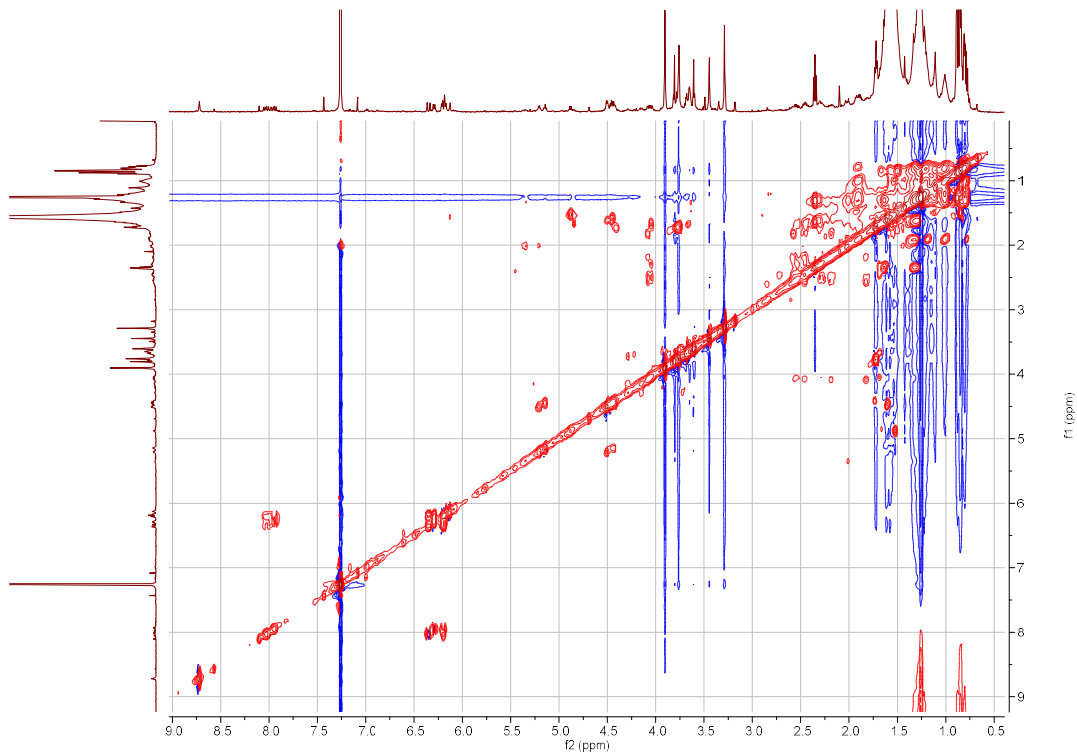

**Figure S 13** - ROESY spectrum  $^{13}\text{C}$ -hydroxy-pheofarnesin a, compound 2, in  $\text{DMSO-}d_6$  (600 MHz).

E4C\_20181221155306 #4283-4437 RT: 12.31-12.75 AV: 78 SB: 1690 6.93-11.66, 13.30-18.26 NL: 4.47E6  
T: FTMS + p ESI Full ms [150.0000-2000.0000]

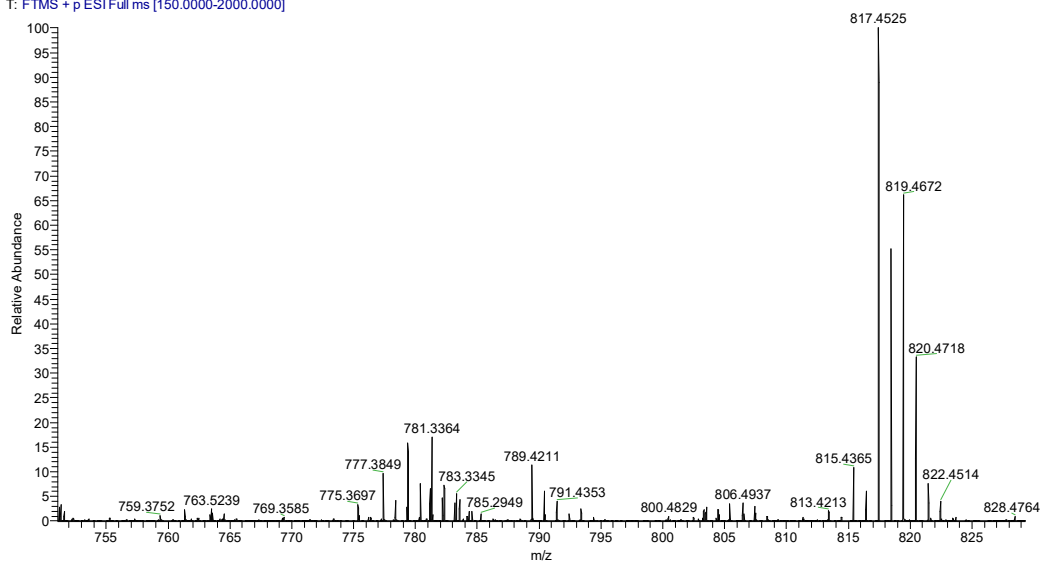

**Figure S 14** - Full LC-ESI-HRMS spectrum of  $^{13}\text{C}$ -hydroxy-pheofarnesin a, compound 2, in the positive mode.

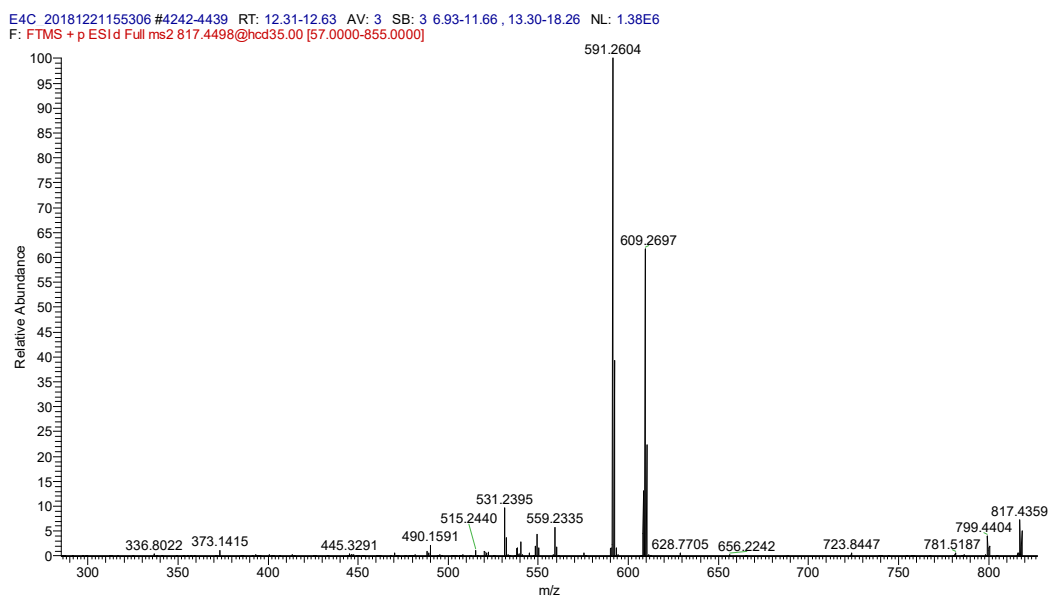

**Figure S 15** - LC-ESI-HRMS chromatogram of  $13^2$ -hydroxy-pheofarnesin a, compound **2**, in the positive mode, showing major fragments  $m/z$  840.4339  $[M + H + Na]^+$ , 609.2697  $[M + 2H - \text{farnesyl}]^+$ , 591.2604  $[M - OH - \text{farnesyl}]^+$ .

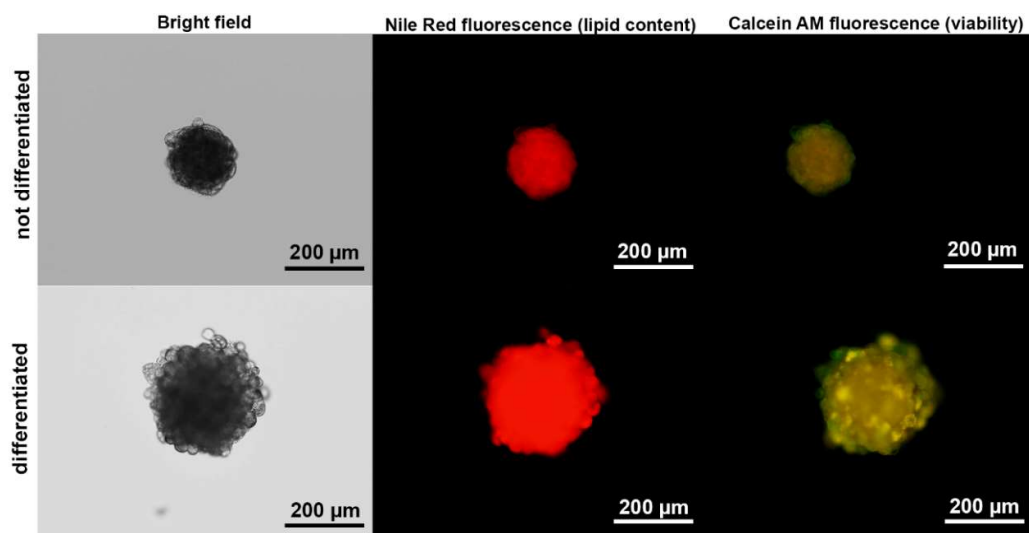

**Figure S 16** - 3T3-L1 organoids without differentiation induction (upper images) and after differentiation induction (lower images). Differentiated organoids were formed during 5 days in DMEM medium and then exposed for 3 days to a differentiated medium, containing 10  $\mu\text{g/ml}$  of insulin, 250 nM dexamethasone and 500  $\mu\text{M}$  of isobutylmethylxanthine. After this step, an exposure assay to 1 or 2 can take place. Not differentiation organoids were cultured as differentiated organoids but without the differentiation medium.

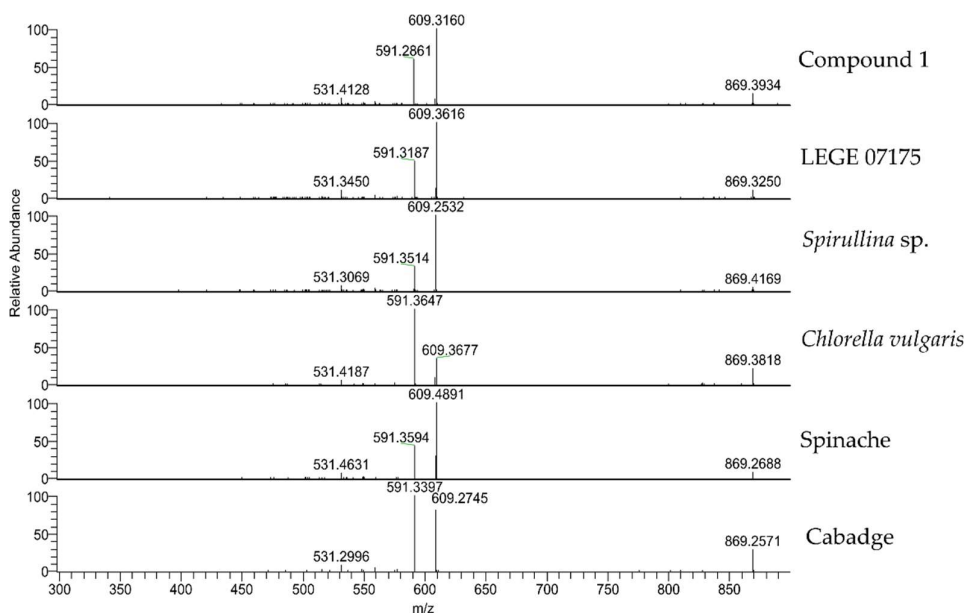

**Figure S 17** – LC-ESI-HRMS/MS chromatogram comparing compound **1** in 5 different alga- plant- based materials, as well as standard compound. Samples were prepared at 0.2 mg/ml in MeOH (100%). Presence of the major fragments of **1** in all samples confirm its presence in the alga- plant- based materials (HR-ESI-MS/MS  $m/z$  869.5542 [M – OH]<sup>+</sup>,  $m/z$  609.2696 [M – phytol]<sup>+</sup>,  $m/z$  591.2602 [M – OH – phytol]<sup>+</sup>).
